# Supplementary material for: The volumetric-tumour histogram-based analysis of intravoxel incoherent motion and non-Gaussian diffusion MRI: association with prognostic factors in HER2-positive breast cancer
Source: J Transl Med. 2019 Jul 2;17:182. doi: 10.1186/s12967-019-1911-6 (PMC6604303; doi:10.1186/s12967-019-1911-6)
Supplement: Supplementary file 1 — Additional file 1. All the parameters of histogram analysis for the whole tumour in different groups. [file 12967_2019_1911_MOESM1_ESM.xlsx]

## Sheet: Sheet1
		HER2(-)		HER2（+）		p value				HR(-)		HR（+）		p value				lymph node(-)		lymph node（+）		p value
		mean	std	mean	std					mean	std	mean	std					mean	std	mean	std
ADC	50th percentile	174.452	80.069	177.83	58.4626	0.77		ADC	50th percentile	186.326	53.0873	167.834	63.5581	0.177		ADC	50th percentile	181.969	96.9281	175.23	65.125	0.6898
	5th percentile	58.7838	37.3508	68.0676	43.2423	0.164			5th percentile	70.05	42.7617	65.7353	44.3287	0.672			5th percentile	62.2	43.8287	63.6172	40.1767	0.884972
	95th percentile	294.108	138.025	280.48	83.0742	0.468			95th percentile	295.962	74.2188	262.265	90.1343	0.082			95th percentile	287.325	136.821	287.289	110.322	0.998957
	skeness	0.293824	0.713351	0.115068	0.564946	0.093			skeness	0.09765	0.574253	0.135559	0.561699	0.776			skeness	0.00765	0.770321	0.235195	0.62405	0.144
	kurtosis	1.10432	2.34877	0.661946	1.52564	0.176			kurtosis	0.580575	1.26465	0.757676	1.80036	0.622			kurtosis	0.7404	1.33385	0.905438	2.07269	0.731
	contrast	8.91228	7.20264	7.10291	4.92519	0.077			contrast	7.15455	4.46833	7.04215	5.48247	0.923			contrast	8.45975	7.90757	7.93695	5.94345	0.728
	entropy	2.92491	0.372446	2.91646	0.323129	0.883			entropy	2.92225	0.349872	2.90965	0.293628	0.869			entropy	2.9521	0.318792	2.91577	0.352687	0.665
Dt	50th percentile	988.297	270.308	983.375	178.11	0.896		Dt	50th percentile	1010.28	178.961	951.717	174.398	0.16		Dt	50th percentile	1025.66	312.269	979.614	212.986	0.403
	5th percentile	501.628	197.809	541.878	170.9	0.187			5th percentile	564.9	170.57	514.794	169.785	0.211			5th percentile	515.6	227.587	522.715	178.873	0.874
	95th percentile	1607.3	427.712	1563.12	320.013	0.478			95th percentile	1582.05	322.746	1540.85	320.142	0.585			95th percentile	1604.9	409.377	1582.13	373.421	0.803
	skeness	0.520838	0.538765	0.570878	0.535238	0.572			skeness	0.504175	0.466079	0.649353	0.604372	0.248			skeness	0.32705	0.581749	0.580047	0.522395	0.079
	kurtosis	0.994432	1.40124	1.43258	1.53885	0.072			kurtosis	1.16665	1.31823	1.74544	1.73152	0.107			kurtosis	0.86175	1.17281	1.26847	1.5223	0.255
	contrast	11.9115	4.99774	11.9211	4.82114	0.991			contrast	11.2749	3.86988	12.6812	5.71111	0.213			contrast	12.661	5.55845	11.7999	4.79523	0.466
	entropy	3.15708	0.190511	3.21465	0.676582	0.482			entropy	3.14008	0.194415	3.30238	0.976365	0.307			entropy	3.2207	0.146096	3.18042	0.530601	0.737
f	50th percentile	127.018	44.8949	124.537	40.6422	0.725		FP	50th percentile	121.789	35.3343	127.769	46.46	0.532		FP	50th percentile	141.113	50.9522	123.381	40.9704	0.084
	5th percentile	20.7432	6.65708	23.8514	9.48168	0.052			5th percentile	24.6	9.33095	22.9706	9.72107	0.465			5th percentile	22.075	7.9261	22.332	8.39977	0.898
	95th percentile	295.892	116.157	281.804	107.033	0.444			95th percentile	276.425	88.5717	288.132	126.469	0.642			95th percentile	330.675	125.085	282.312	108.346	0.071
	skeness	1.53145	0.800199	1.5687	0.660975	0.758			skeness	1.60622	0.618951	1.52456	0.714128	0.6			skeness	1.40125	0.552143	1.57333	0.754946	0.33
	kurtosis	4.77264	8.4304	4.61424	4.0714	0.884			kurtosis	4.7582	3.75446	4.44488	4.46713	0.744			kurtosis	3.14765	2.60164	4.93497	6.99571	0.261
	contrast	17.9945	13.4499	16.3011	10.1274	0.388			contrast	15.6517	10.368	17.0651	9.93638	0.553			contrast	20.135	14.4657	16.681	11.4386	0.228
	entropy	2.80451	0.192184	2.85932	0.198867	0.09			entropy	2.87167	0.181909	2.84479	0.219033	0.566			entropy	2.77835	0.246526	2.84029	0.187678	0.192
D*	50th percentile	107.44	27.17	112.5	25.58	0.245		D*	50th percentile	113.67	20.09	113.13	31.1	0.674		D*	50th percentile	118.1	28.14	108.7	26.03	0.14
	5th percentile	22.12	7.8	24.75	8.4	0.051			5th percentile	25.38	7.85	24.01	9.08	0.492			5th percentile	25.53	6.51	23.11	8.4	0.15
	95th percentile	229.29	68.9	235.21	73.2	0.613			95th percentile	234.9	50.34	235.57	94.13	0.969			95th percentile	257.2	87.11	228.35	67.61	0.091
	skeness	1.55	1.34	1.38	0.88	0.355			skeness	1.53	0.97	1.19	0.74	0.099			skeness	1.51	0.78	1.45	1.18	0.795
	kurtosis	7.24	18.71	5.31	8.38	0.419			kurtosis	6.35	9.99	4.09	5.89	0.25			kurtosis	5.42	5.59	6.41	15.42	0.595
	contrast	4.49	3.22	5.14	5.58	0.386			contrast	4.49	2.69	5.9	7.7	0.285			contrast	4.99	3.64	4.78	4.69	0.821
	entropy	2.33	0.32	2.4	0.32	0.205			entropy	2.42	0.29	2.38	0.36	0.521			entropy	2.3	0.26	2.38	0.33	0.227
MK	50th percentile	1058.24	276.334	994.105	204.859	0.111		MK	50th percentile	977.696	211.004	1013.41	198.768	0.459		MK	50th percentile	1002.51	266.083	1029.87	241.908	0.643
	5th percentile	628.034	148.197	625.223	144.812	0.907			5th percentile	630.337	121.763	619.206	169.701	0.744			5th percentile	584.075	159.895	633.277	143.268	0.162
	95th percentile	1698.83	928.571	1489.99	611.508	0.108			95th percentile	1455.4	625.578	1530.69	601.287	0.601			95th percentile	1552.58	722.595	1600.95	803.017	0.8
	skeness	3.21853	3.60081	3.99224	4.91775	0.277			skeness	4.36485	4.88241	3.55388	4.99601	0.483			skeness	2.74005	3.51546	3.74059	4.42076	0.336
	kurtosis	41.4076	77.0969	72.2843	152.357	0.122			kurtosis	79.833	149.579	63.4034	157.345	0.647			kurtosis	30.7111	56.4286	60.9295	128.204	0.302
	contrast	2.85516	4.10511	2.20399	3.08917	0.277			contrast	1.92732	2.48483	2.52947	3.68935	0.407			contrast	2.40845	3.63995	2.5485	3.64836	0.873
	entropy	1.20324	0.453087	1.39008	0.474647	0.015			entropy	1.14958	0.455804	1.26638	0.448321	0.272			entropy	1.3724	0.53717	1.28483	0.462011	0.442
MD	50th percentile	1336.44	324.981	1338.15	229.672	0.971		MD	50th percentile	1363.41	211.844	1308.44	248.933	0.308		MD	50th percentile	1395.61	389.232	1328.19	260.275	0.319
	5th percentile	779.27	226.004	828.318	184.84	0.151			5th percentile	804.08	129.74	850.12	144.58	0.041			5th percentile	816.05	238.537	801.879	202.877	0.777
	95th percentile	2052.66	466.514	2014.57	358.781	0.579			95th percentile	2034.78	325.869	1990.79	397.714	0.603			95th percentile	2087.55	459.32	2025.19	409.168	0.534
	skeness	0.582473	0.528619	0.684622	0.487142	0.224			skeness	0.612775	0.488978	0.769147	0.478291	0.17			skeness	0.5198	0.640499	0.65132	0.486144	0.284
	kurtosis	0.724122	1.43344	1.21504	2.2152	0.112			kurtosis	1.13365	2.70478	1.31079	1.48043	0.734			kurtosis	0.8992	1.29695	0.980578	1.95432	0.858
	contrast	7.09922	4.81413	6.14012	3.09689	0.152			contrast	5.7953	3.29774	6.54579	2.83721	0.302			contrast	7.77655	3.82116	6.43891	4.0834	0.172
	entropy	2.93422	0.245443	2.8795	0.230197	0.164			entropy	2.87585	0.247671	2.88379	0.211407	0.884			entropy	2.9814	0.152464	2.19521	0.24793	0.04
